# Supplementary material for: Microbial community structure of two freshwater sponges using Illumina MiSeq sequencing revealed high microbial diversity
Source: PubMed Central journal article supplement (PMC4908081; doi:10.1186/s13568-016-0211-2), 2016-06-14

Journal Name: AMB Express

Title: Microbial community structure of two freshwater sponges using Illumina MiSeq sequencing revealed high microbial diversity.

Swapnil Sopan Gaikwad<sup>1,2</sup> Yogesh S. Shouche<sup>2</sup>, Wasudeo N. Gade<sup>1\*</sup>

<sup>1</sup>Department of Biotechnology, Savitribai Phule Pune University, Pune-411007, Maharashtra, India.

<sup>2</sup>Microbial culture collection (MCC), First floor, Central Tower, Sai Trinity Building Garware Circle, Sutarwadi, Pashan Pune, Maharashtra 411021, India.

\* Corresponding author

Dr. W. N. Gade

Professor,

Department of Biotechnology,

Savitribai Phule Pune University,

Ganeshkhind, Pune-411007.

Maharashtra, India.

Email: wngade@unipune.ac.in

Phone: +91-020-25694952.

**Table S1:** Collection details of the samples studied.

| No. | Sample code | Locality                      | latitude | longitude | Collection date |
|-----|-------------|-------------------------------|----------|-----------|-----------------|
| 1   | PSPO1       | Pashan, Pune, India           | 18.5337  | 73.7900   | 2015-01-06      |
| 2   | PSPO2       | Pashan, Pune, India           | 18.5337  | 73.7900   | 2015-01-06      |
| 3   | PSPO3       | Pashan, Pune, India           | 18.5337  | 73.7900   | 2015-01-06      |
| 4   | PWAT1       | Pashan, Pune, India           | 18.5337  | 73.7900   | 2015-01-06      |
| 5   | PWAT2       | Pashan, Pune, India           | 18.5337  | 73.7900   | 2015-01-06      |
| 6   | PWAT3       | Pashan, Pune, India           | 18.5337  | 73.7900   | 2015-01-06      |
| 7   | TSPO 1      | Talegaon Dabhade, Pune, India | 18.7165  | 73.6864   | 2015-01-07      |
| 8   | TSPO 2      | Talegaon Dabhade, Pune, India | 18.7176  | 73.6896   | 2015-01-07      |
| 9   | TSPO 3      | Talegaon Dabhade, Pune, India | 18.7174  | 73.6899   | 2015-01-07      |
| 10  | TWAT 1      | Talegaon Dabhade, Pune, India | 18.7165  | 73.6864   | 2015-01-07      |
| 11  | TWAT 2      | Talegaon Dabhade, Pune, India | 18.7176  | 73.6896   | 2015-01-07      |
| 12  | TWAT 3      | Talegaon Dabhade, Pune, India | 18.7174  | 73.6899   | 2015-01-07      |

**Table S2:** Ecological parameters measured for the water samples collected from the two habitats. The measurements were done in triplicates, mean value are shown here and standard error in parenthesis. P - value are calculated using T test in PAST software.

| No | Ecological parameters | TWAT         | PWAT        | p value  |
|----|-----------------------|--------------|-------------|----------|
| 1  | DO (mg/L)             | 6            | 4.5         | < 0.0001 |
| 2  | TDS (mg/L)            | 240 ± 0.88   | 255 ± 2.9   | 0.01     |
| 3  | Nitrite (mg/L)        | 0            | 3.13 ± 0.06 | 0.0002   |
| 4  | pH                    | 7.1          | 8.2 ± 0.033 | < 0.0001 |
| 5  | Phosphate (mg/L)      | 1.86 ± 0.033 | 1           | < 0.0001 |
| 6  | Ammonia (mg/L)        | 0.66 ± 0.033 | 0.8         | < 0.0001 |
| 7  | Temperature (°C)      | 23           | 27          | < 0.0001 |

**Fig S1:** The distribution of bacterial community between TSPO and PSPO samples. Bacterial abundance in the PSPO sample has a positive difference between proportions (blue circles), whereas bacterial abundance in the TSPO sample has a negative difference between proportions (green circles). Bars on the left represent the proportion of each bacterial phyla abundance in the samples. p values are shown in the right side.

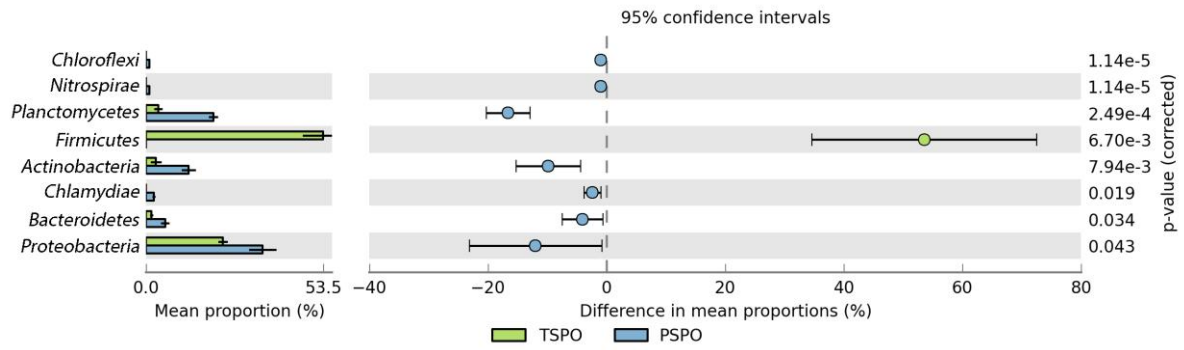

**Fig S2:** Two dimensional non-metric multidimensional scaling (NMDS) of the bacterial communities of the freshwater sponges and marine sponges. A convex hull encloses all samples of the same category forming distinct cluster. NMDS plot is based on the Bray-curtis similarity index. There was significant difference in microbial community structure of marine sponges and freshwater sponges.

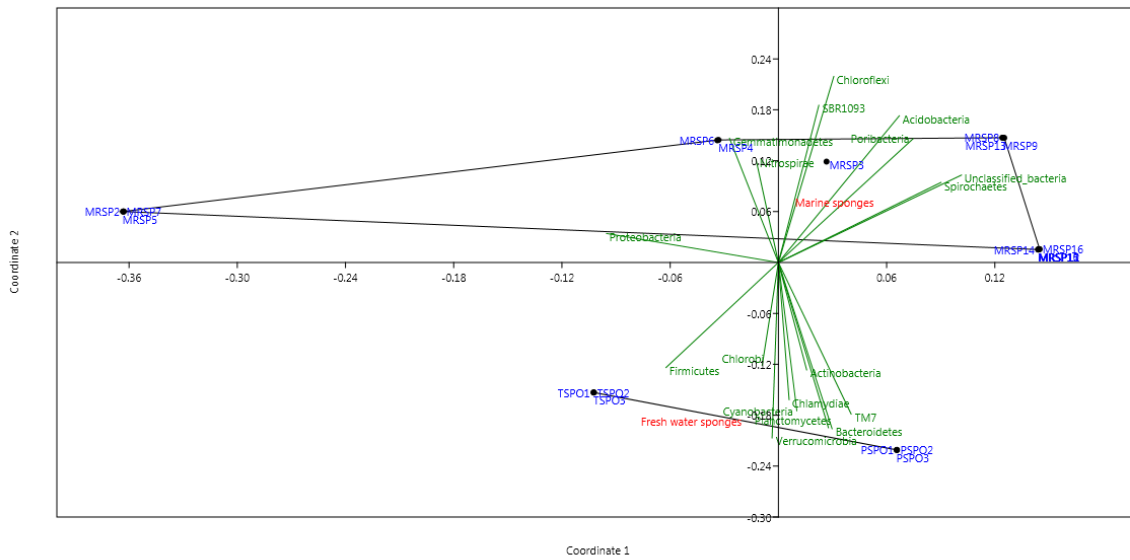

Supplement: 13568_2016_211_MOESM1_ESM.pdf [file 13568_2016_211_MOESM1_ESM.pdf]
